# Supplementary material for: Efficacy of miRNA-modified mesenchymal stem cell extracellular vesicles in spinal cord injury: A systematic review of the literature and network meta-analysis
Source: Front Neurosci. 2022 Oct 5;16:989295. doi: 10.3389/fnins.2022.989295 (PMC9581233; doi:10.3389/fnins.2022.989295)
Supplement: Supplementary file 3 [file Table_3.XLS]

## Sheet: Sheet1
Dose-D3
EVs100	0.01 (-0.79, 0.8)	0.87 (0.36, 1.39)	1.1 (0.29, 1.9)	-0.43 (-0.95, 0.08)
-0.01 (-0.8, 0.79)	EVs200	0.86 (0.07, 1.67)	1.09 (0.47, 1.71)	-0.44 (-1.05, 0.16)
-0.87 (-1.39, -0.36)	-0.86 (-1.67, -0.07)	miREVs100	0.23 (-0.59, 1.03)	-1.3 (-1.84, -0.79)
-1.1 (-1.9, -0.29)	-1.09 (-1.71, -0.47)	-0.23 (-1.03, 0.59)	miREVs200	-1.53 (-2.15, -0.91)
0.43 (-0.08, 0.95)	0.44 (-0.16, 1.05)	1.3 (0.79, 1.84)	1.53 (0.91, 2.15)	PBS
Dose-D14
EVs100	0.11 (-3.17, 3.4)	3.24 (1.33, 5.13)	3.5 (0.2, 6.78)	-1.61 (-3.51, 0.3)
-0.11 (-3.4, 3.17)	EVs200	3.12 (-0.17, 6.39)	3.38 (0.68, 6.09)	-1.73 (-4.41, 0.95)
-3.24 (-5.13, -1.33)	-3.12 (-6.39, 0.17)	miREVs100	0.26 (-3.03, 3.56)	-4.85 (-6.74, -2.94)
-3.5 (-6.78, -0.2)	-3.38 (-6.09, -0.68)	-0.26 (-3.56, 3.03)	miREVs200	-5.11 (-7.79, -2.42)
1.61 (-0.3, 3.51)	1.73 (-0.95, 4.41)	4.85 (2.94, 6.74)	5.11 (2.42, 7.79)	PBS
Dose-D28
EVs100	0.17 (-4.75, 5.04)	3.9 (0.82, 6.98)	4.5 (-0.41, 9.36)	-3.31 (-6.42, -0.24)
-0.17 (-5.04, 4.75)	EVs200	3.74 (-1.15, 8.63)	4.33 (0.57, 8.12)	-3.48 (-7.26, 0.34)
-3.9 (-6.98, -0.82)	-3.74 (-8.63, 1.15)	miREVs100	0.59 (-4.32, 5.46)	-7.22 (-10.29, -4.14)
-4.5 (-9.36, 0.41)	-4.33 (-8.12, -0.57)	-0.59 (-5.46, 4.32)	miREVs200	-7.81 (-11.57, -4.03)
3.31 (0.24, 6.42)	3.48 (-0.34, 7.26)	7.22 (4.14, 10.29)	7.81 (4.03, 11.57)	PBS
Model-D3
EVsCompression	0.24 (-0.63, 1.1)	1.12 (0.37, 1.86)	1.18 (0.31, 2.05)	-0.24 (-0.97, 0.49)
-0.24 (-1.1, 0.63)	EVsContusion	0.87 (0, 1.76)	0.94 (0.47, 1.41)	-0.48 (-0.94, -0.02)
-1.12 (-1.86, -0.37)	-0.87 (-1.76, 0)	miREVsCompression	0.06 (-0.82, 0.95)	-1.35 (-2.11, -0.61)
-1.18 (-2.05, -0.31)	-0.94 (-1.41, -0.47)	-0.06 (-0.95, 0.82)	miREVsContusion	-1.42 (-1.89, -0.96)
0.24 (-0.49, 0.97)	0.48 (0.02, 0.94)	1.35 (0.61, 2.11)	1.42 (0.96, 1.89)	PBS
Model-D14
EVsCompression	1.55 (-1.71, 4.81)	2.8 (-0.09, 5.72)	3.65 (0.39, 6.89)	-0.87 (-3.72, 1.99)
-1.55 (-4.81, 1.71)	EVsContusion	1.24 (-2, 4.51)	2.1 (0.53, 3.62)	-2.42 (-3.96, -0.86)
-2.8 (-5.72, 0.09)	-1.24 (-4.51, 2)	miREVsCompression	0.85 (-2.42, 4.07)	-3.66 (-6.53, -0.8)
-3.65 (-6.89, -0.39)	-2.1 (-3.62, -0.53)	-0.85 (-4.07, 2.42)	miREVsContusion	-4.52 (-6.04, -2.95)
0.87 (-1.99, 3.72)	2.42 (0.86, 3.96)	3.66 (0.8, 6.53)	4.52 (2.95, 6.04)	PBS
Model-D28
EVsCompression	1.73 (-3.41, 6.88)	3.68 (-1.1, 8.48)	4.52 (-0.69, 9.6)	-2.31 (-7.14, 2.5)
-1.73 (-6.88, 3.41)	EVsContusion	1.95 (-3.21, 7.06)	2.78 (0.92, 4.58)	-4.05 (-5.87, -2.23)
-3.68 (-8.48, 1.1)	-1.95 (-7.06, 3.21)	miREVsCompression	0.83 (-4.35, 5.95)	-5.99 (-10.82, -1.16)
-4.52 (-9.6, 0.69)	-2.78 (-4.58, -0.92)	-0.83 (-5.95, 4.35)	miREVsContusion	-6.83 (-8.63, -4.96)
2.31 (-2.5, 7.14)	4.05 (2.23, 5.87)	5.99 (1.16, 10.82)	6.83 (4.96, 8.63)	PBS
